# Supplementary material for: Double strengthening induced by grain boundary segregation of solute elements in gradient nano Ni–Co alloys
Source: Royal Society of Chemistry journal article supplement (doi:10.1039/d3cp03613h), 2023-01-01
Supplement: d3cp03613h1.pdf [file d3cp03613h1.pdf]

## Supplemental Materials

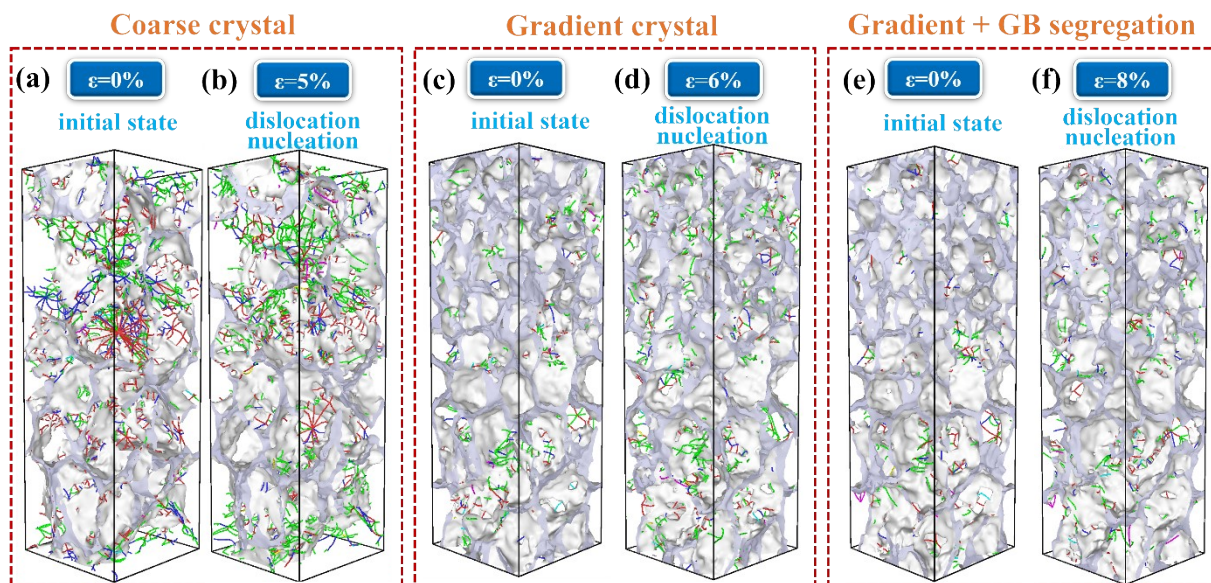

**S1** Initial dislocation network structure in a stable structure with strain 0 of (a)coarse crystal (c)gradient crystal and (e) double structure, the dislocation network in the grain collapses and the nucleation state of dislocation in the grain under the corresponding strain of (b)coarse crystal (d)gradient crystal and (f) double structure.

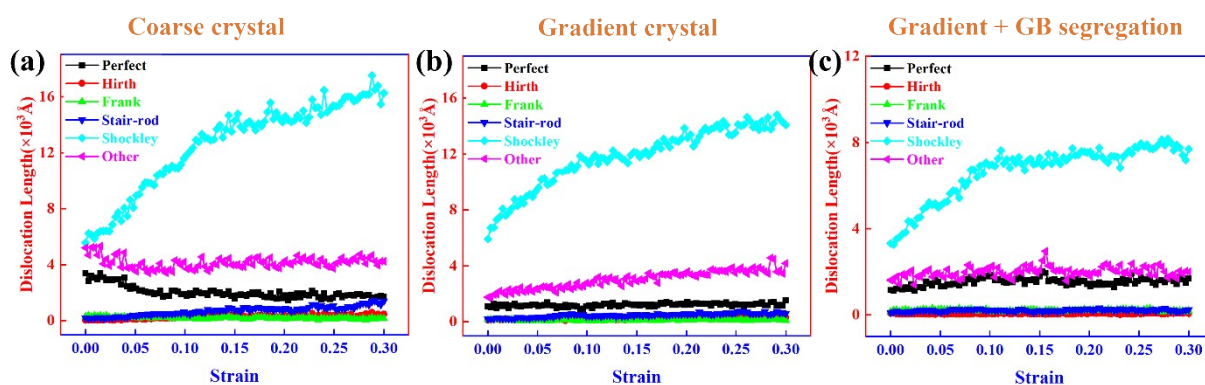

**S2** Variations in the length of various dislocations of (a)Coarse crystal (b)gradient crystal and (c) double structure.
